# Supplementary material for: Isolated Pd Sites as Selective Catalysts for Electrochemical and Direct Hydrogen Peroxide Synthesis
Source: Atypon-hosted journal article supplement (doi:10.1021/acscatal.0c01305), 2020-04-23
Supplement: cs0c01305_si_001.pdf [file cs0c01305_si_001.pdf]

# Supporting Information

## Isolated Pd Sites as Selective Catalysts for Electrochemical and Direct Hydrogen Peroxide Synthesis

Marc Ledendecker<sup>a,b</sup>, Enrico Pizzutilo<sup>a</sup>, Grazia Malta<sup>c</sup>, Guilherme V. Fortunato<sup>a,d</sup>, Karl J. J. Mayrhofer<sup>a,e,f</sup>, Graham J. Hutchings<sup>c</sup> and Simon J. Freakley<sup>g\*</sup>

<sup>a</sup> Department of Interface Chemistry and Surface Engineering, Max-Planck-Institut für Eisenforschung GmbH, Max-Planck-Strasse 1, 40237 Düsseldorf, Germany.

<sup>b</sup> Department of Technical Chemistry, Technical University Darmstadt, Alarich-Weiss Straße 8, 64287 Darmstadt, Germany

<sup>c</sup> Cardiff Catalysis Institute, School of Chemistry, Cardiff University, Main Building, Park Place, Cardiff, CF10 3AT, UK.

<sup>d</sup> Institute of Chemistry, Universidade Federal de Mato Grosso do Sul; Av. Senador Filinto Muller, 1555; Campo Grande, MS 79074-460, Brazil.

<sup>e</sup> Helmholtz-Institute Erlangen-Nürnberg for Renewable Energy (IEK-11), Forschungszentrum Jülich, Egerlandstr. 3, 91058 Erlangen, Germany.

<sup>f</sup> Department of Chemical and Biological Engineering, Friedrich-Alexander-Universität Erlangen-Nürnberg, Egerlandstr. 3, 91058 Erlangen, Germany.

<sup>g</sup> Department of Chemistry, University of Bath, Claverton Down, Bath, BA2 7AY, UK.

[\\*s.freakley@bath.ac.uk](mailto:s.freakley@bath.ac.uk)

### Contents

**Table S1-3**

**Figure S1-S5**

**Table S1 – Surface Composition of 1% PdCl<sub>2</sub>/C determined by XPS survey scan**

| Element (Orbital) | Atomic % | Weight % |
|-------------------|----------|----------|
| O (1s)            | 6.6      | 8.1      |
| C (1s)            | 90.2     | 82.8     |
| Cl (2p)           | 2.5      | 6.7      |
| Na (1s)           | 0.1      | 0.2      |
| Si (2p)           | 0.4      | 0.9      |
| Pd (3d)           | 0.2      | 1.3      |

**Table S2 – Comparison with state-of-the-art catalysts under identical conditions for direct H<sub>2</sub>O<sub>2</sub> synthesis.**

| Catalyst                                    | Preparation Method    | Nanostructure                                                   | H <sub>2</sub> O <sub>2</sub> Productivity <sup>d</sup><br>(mol / kg / h) | H <sub>2</sub> O <sub>2</sub> Degradation <sup>e</sup><br>(mol / kg / h) |
|---------------------------------------------|-----------------------|-----------------------------------------------------------------|---------------------------------------------------------------------------|--------------------------------------------------------------------------|
| 5% Pd/C <sup>a</sup>                        | Wet impregnation      | PdO nanoparticles<br>(2-20 nm)                                  | 52                                                                        | 255*                                                                     |
| 2.5% Au 2.5% Pd / C <sup>a</sup>            | Wet impregnation      | Homogeneous AuPd alloys<br>(2-10 nm)                            | 160                                                                       | 0                                                                        |
| 3% Pd 2% Sn / TiO <sub>2</sub> <sup>b</sup> | Wet impregnation      | Sn-Pd nanoparticles<br>(isolated species to<br>10 nm particles) | 60                                                                        | 0                                                                        |
| 1% Pd/C <sup>c</sup>                        | Aqua regia            | Isolated Pd(II) sites                                           | 30                                                                        | 52                                                                       |
| Bare Carbon                                 | Aqua regia            | -                                                               | 0                                                                         | 45                                                                       |
| 1% Pd/C <sup>c</sup>                        | Sol<br>Immobilisation | Metallic Pd<br>nanoparticles<br>(2-6 nm)                        | 120                                                                       | 360                                                                      |

<sup>a</sup> J. K. Edwards *et al. Science*, **2009**, 323, 1037-1041 <sup>b</sup> S. J. Freakley *et al. Science*, **2016**, 351, 965-968.

<sup>c</sup> this work \*estimated from figure 1

<sup>d</sup> 2 °C, 10 mg catalyst, 29 bar 5% H<sub>2</sub>/CO<sub>2</sub>, 11 bar 25% O<sub>2</sub>/CO<sub>2</sub>, 8.5 g solvent (5.6 g CH<sub>3</sub>OH + 2.9 g H<sub>2</sub>O) 1200 rpm, 30 mins.

<sup>e</sup> 2 °C, 10 mg catalyst, 29 bar 5% H<sub>2</sub>/CO<sub>2</sub>, 8.5 g solvent (5.6 g CH<sub>3</sub>OH + 2.22 g H<sub>2</sub>O + 0.68 g 50% H<sub>2</sub>O<sub>2</sub> (10 mmol)) 1200 rpm, 30 mins.

**Figure S1** - Cl (1s) X-ray photoemission spectroscopy of the 1% Pd / C carbon catalyst prepared by wet impregnation from aqua regia and dried under N<sub>2</sub> at 140 °C showing organic (~200 eV) and inorganic Cl (~198 eV) species.

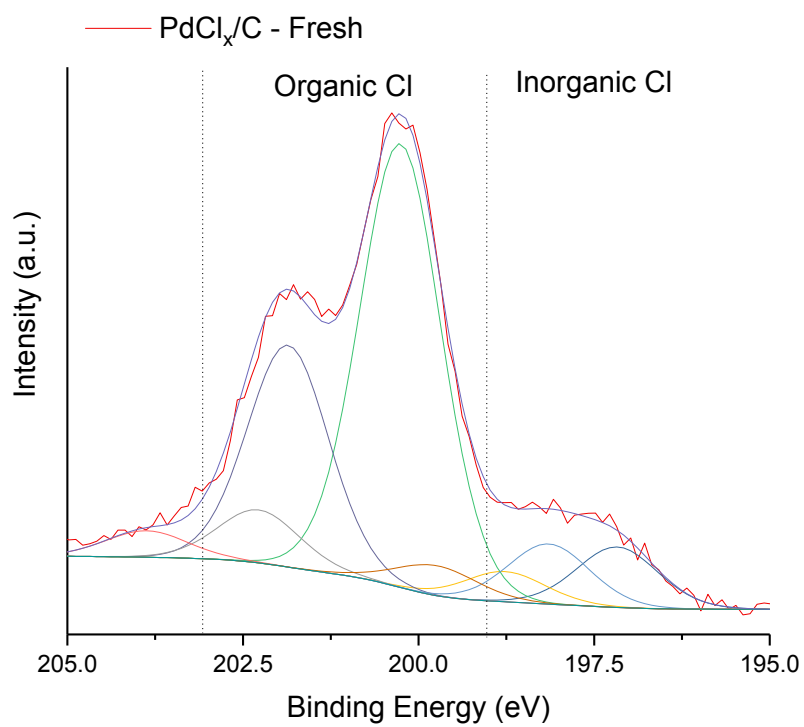

**Figure S2** – Representative TEM image and particle size distribution of a 1% Pd/C prepared by sol immobilization as a comparative catalyst containing metallic nanoparticles.

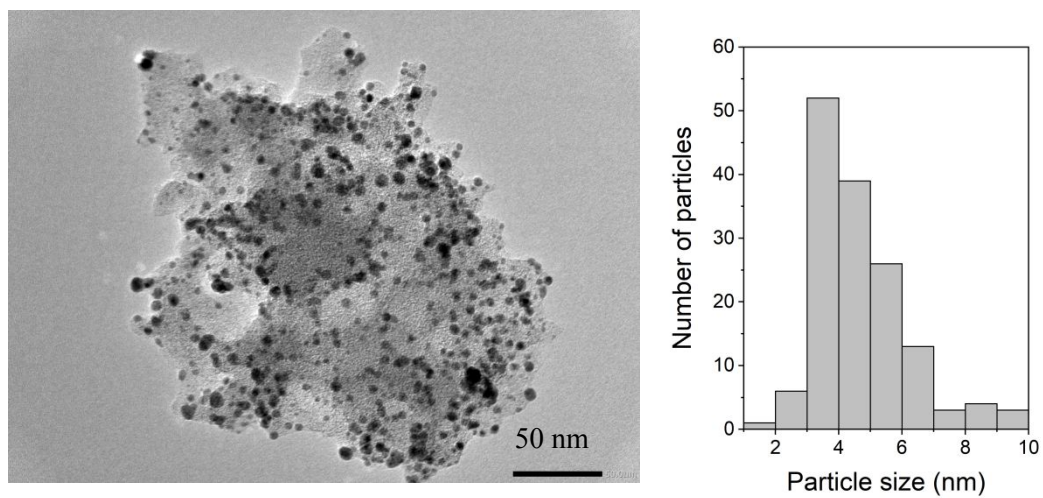

**Figure S3 – XAFS fitting parameters of fresh (a) and used (direct synthesis) (b) PdCl<sub>x</sub>/C to determine Pd-Cl first shell co-ordination using Demeter software package.**

**(A)**

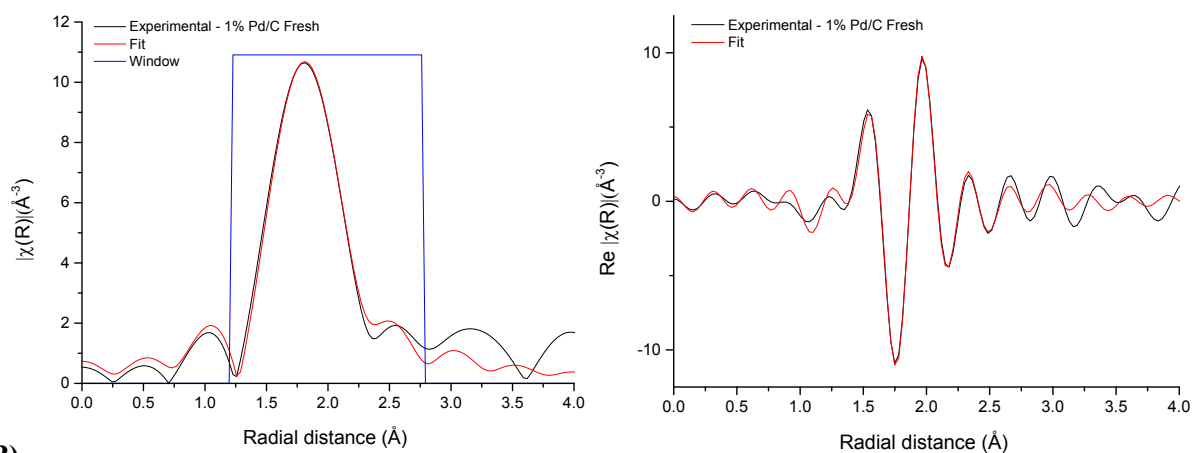

**(B)**

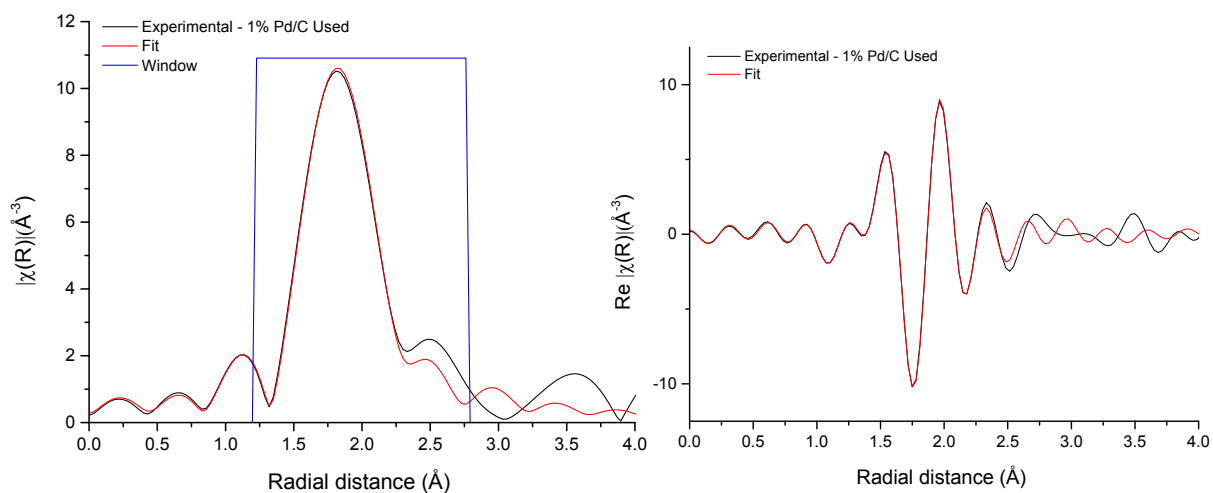

Table S3 - EXAFS distances and fitting parameters for the Pd/C catalyst, fresh and used.

| Sample       | Absorber-Scatterer | R (X)<br>Å    | CN         | 2σ <sup>2</sup> (X) | ΔE <sub>0</sub> (eV) | R <sub>factor</sub> |
|--------------|--------------------|---------------|------------|---------------------|----------------------|---------------------|
| Pd/C - Fresh | Pd-Cl              | 2.308 ± 0.008 | 3.99 ± 0.4 | 0.0016 ± 0.0012     | 4.5 ± 1.05           | 0.005               |
| Pd/C - Used  | Pd-Cl              | 2.305 ± 0.01  | 3.85 ± 0.5 | 0.002 ± 0.0016      | 4.7 ± 1.41           | 0.01                |

R (X) = radial distance, 2σ<sup>2</sup> (X) = Debye-Waller factor, CN = Coordination number

Fitting parameters: S<sub>0</sub><sup>2</sup> = 0.8 as deduced by Pd foil reference; fit range 3 < k < 9.5, 1.2 < R < 2.8.

**Figure S4** – Cyclic voltammetry of PdCl<sub>x</sub>/C in 0.1M HClO<sub>4</sub>, Ar<sub>sat.</sub> before and after 1000 potential cycles between 0.05 – 0.8V.

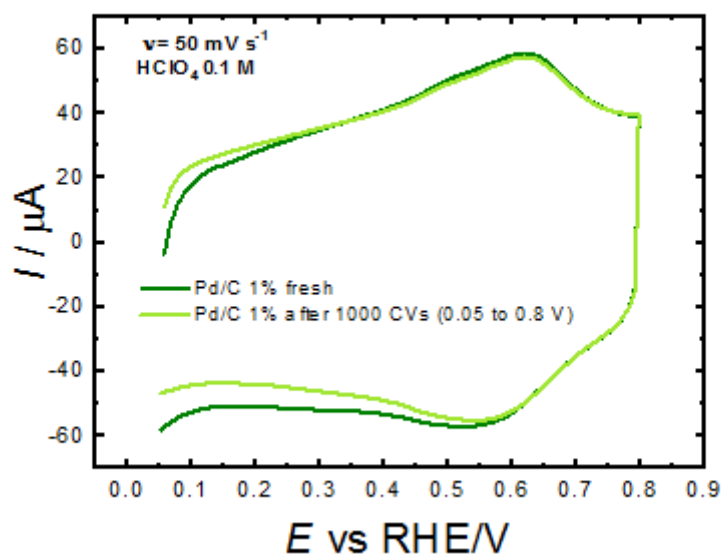

**Figure S5** – Comparison of various catalysts towards the electrochemical reduction of oxygen towards  $\text{H}_2\text{O}_2$ . Adapted from Reference <sup>1</sup>. The original references are Pt-Hg(pc)<sup>2</sup>, Pd-Hg(pc)<sup>3</sup>, Pt/SC<sup>4</sup>, Pt/TiN<sup>5</sup>, RF-AQ/VC, VC, Vulcan XC72,<sup>6</sup> N/C<sup>7</sup>; Pd-Au/C<sup>8</sup>, Au<sup>9</sup>; Au-Pd/NP<sup>10</sup>; Ag-Hg (pc), Ag<sup>2</sup>.

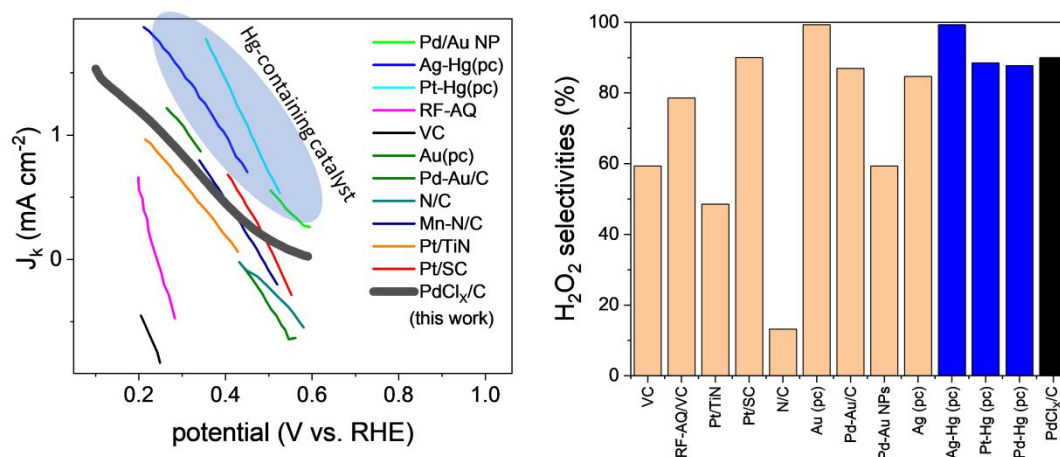

## References

1. Yang, S.; Verdager-Casadevall, A.; Arnarson, L.; Silvioli, L.; Čolić, V.; Frydendal, R.; Rossmeisl, J.; Chorkendorff, I.; Stephens, I. E. L., Toward the Decentralized Electrochemical Production of  $\text{H}_2\text{O}_2$ : A Focus on the Catalysis. *ACS Catalysis* **2018**, 8 (5), 4064-4081.
2. Siahrostami, S.; Verdager-Casadevall, A.; Karamad, M.; Deiana, D.; Malacrida, P.; Wickman, B.; Escudero-Escribano, M.; Paoli, E. A.; Frydendal, R.; Hansen, T. W.; Chorkendorff, I.; Stephens, I. E. L.; Rossmeisl, J., Enabling direct  $\text{H}_2\text{O}_2$  production through rational electrocatalyst design. *Nature Materials* **2013**, 12 (12), 1137-1143.
3. Verdager-Casadevall, A.; Deiana, D.; Karamad, M.; Siahrostami, S.; Malacrida, P.; Hansen, T. W.; Rossmeisl, J.; Chorkendorff, I.; Stephens, I. E. L., Trends in the Electrochemical Synthesis of  $\text{H}_2\text{O}_2$ : Enhancing Activity and Selectivity by Electrocatalytic Site Engineering. *Nano Letters* **2014**, 14 (3), 1603-1608.
4. Choi, C. H.; Kim, M.; Kwon, H. C.; Cho, S. J.; Yun, S.; Kim, H.-T.; Mayrhofer, K. J. J.; Kim, H.; Choi, M., Tuning selectivity of electrochemical reactions by atomically dispersed platinum catalyst. *Nature Communications* **2016**, 7 (1), 10922.
5. Yang, S.; Kim, J.; Tak, Y. J.; Soon, A.; Lee, H., Single-Atom Catalyst of Platinum Supported on Titanium Nitride for Selective Electrochemical Reactions. *Angewandte Chemie International Edition* **2016**, 55 (6), 2058-2062.
6. Wang, A.; Bonakdarpour, A.; Wilkinson, D. P.; Gyenge, E., Novel organic redox catalyst for the electroreduction of oxygen to hydrogen peroxide. *Electrochimica Acta* **2012**, 66, 222-229.
7. Hasché, F.; Oezaslan, M.; Strasser, P.; Fellerger, T.-P., Electrocatalytic hydrogen peroxide formation on mesoporous non-metal nitrogen-doped carbon catalyst. *Journal of Energy Chemistry* **2016**, 25 (2), 251-257.
8. Jirkovský, J. S.; Panas, I.; Ahlberg, E.; Halasa, M.; Romani, S.; Schiffrin, D. J., Single Atom Hot-Spots at Au-Pd Nanoalloys for Electrocatalytic  $\text{H}_2\text{O}_2$  Production. *Journal of the American Chemical Society* **2011**, 133 (48), 19432-19441.
9. Jirkovský, J. S.; Halasa, M.; Schiffrin, D. J., Kinetics of electrocatalytic reduction of oxygen and hydrogen peroxide on dispersed gold nanoparticles. *Physical Chemistry Chemical Physics* **2010**, 12 (28), 8042-8053.
10. Pizzutilo, E.; Kasian, O.; Choi, C. H.; Cherevko, S.; Hutchings, G. J.; Mayrhofer, K. J. J.; Freakley, S. J., Electrocatalytic synthesis of hydrogen peroxide on Au-Pd nanoparticles: From fundamentals to continuous production. *Chemical Physics Letters* **2017**, 683, 436-442.
